# Supplementary material for: Encapsulated anion-dominated photocatalytic and adsorption performances for organic dye degradation and oxoanion pollutant capture over cationic Cu(i)-organic framework semiconductors
Source: Royal Society of Chemistry journal article supplement (doi:10.1039/d0dt03662e), 2020-11-18
Supplement: d0dt03662e1.pdf [file d0dt03662e1.pdf]

Supporting information

**Encapsulated anion-dominated photocatalytic and adsorption performances for organic dyes degradation and oxoanion pollutants capture over cationic Cu(I)-organic framework semiconductors**

Yan Zhao,<sup>a, b</sup> Lei Li,<sup>a, b</sup> Bo Ding,<sup>b</sup> Xiu-Guang Wang,<sup>b</sup> Zheng-Yu Liu,<sup>b</sup> En-Cui Yang,<sup>\*, b</sup> Xiao-Jun Zhao<sup>\*, a, b</sup>

<sup>a</sup> *Department of Chemistry, Collaborative Innovation Center of Chemical Science and Engineering, Nankai University, Tianjin 300071, People's Republic of China*

<sup>b</sup> *College of Chemistry, Key Laboratory of Inorganic-Organic Hybrid Functional Material Chemistry, Ministry of Education, Tianjin Key Laboratory of Structure and Performance for Functional Molecules, Tianjin Normal University, Tianjin 300387, People's Republic of China*

**Physical measurements.** Elemental analyses for C, H and N were carried out with a CE-440 (Leeman-Labs) analyzer. Fourier transform (FT) IR spectra (KBr pellets) were taken on an Avatar-370 (Nicolet) spectrometer in the range 4000–400 cm<sup>-1</sup>. Thermogravimetric analysis (TGA) experiment was performed on a Shimadzu simultaneous DTG-60A compositional analysis instrument from room temperature to 800 °C under N<sub>2</sub> atmosphere at a heating rate of 5 °C min<sup>-1</sup>. Powder X-ray diffraction (PXRD) patterns were obtained from a Bruker D8 ADVANCE diffractometer at 40 kV and 40 mA for Cu K $\alpha$  radiation ( $\lambda = 1.5406 \text{ \AA}$ ), with a scan speed of 0.1 sec/step and a step size of 0.01° in  $2\theta$ . The simulated PXRD pattern was calculated using single-crystal X-ray diffraction data and processed by the free Mercury v1.4 program provided by the Cambridge Crystallographic Data Center. UV-vis absorption spectra of photocatalytic and adsorption reaction were on a Shimadzu UV-2700 spectrophotometer in the range 200-800nm. UV/Vis diffuse reflectance spectra (DRS) were carried out on a U-4100 UV-vis spectrophotometer (HITACHI) equipped with an integrating sphere assembly. The scanning electron microscope (SEM) characterization and energy dispersive X-ray spectroscopy (EDX) analysis were performed by a field-emission scanning electron microscope (SEM, FEI NOVA Nano SEM 230) with energy dispersive X-ray spectroscope (EDX). Electrochemical Mott-Schottky plots were measured on an AMETEK Princeton Applied Research (Versa STAT 4) electrochemical workstation using MOF **1**/FTO or **2**/FTO combination as the working electrode, a platinum foil as the counter electrode and a saturated Ag/AgCl/KCl as the reference electrode. A 300 W Xenon lamp (CEL-HUV300) was used as the light source. The working electrode **1**/FTO or **2**/FTO were prepared by dropping 50  $\mu\text{L}$  of sample suspensions containing photocatalyst **1** or **2** (3.0 mg), ethanol (1.0 mL), Nafion (20  $\mu\text{L}$ ) directly onto a FTO plate. The surface area of the working electrode exposed to the

electrolyte was about 0.64 cm<sup>2</sup>. The Mott-Schottky plots of **1/2** electrode were measured in 0.2 M Na<sub>2</sub>SO<sub>4</sub> aqueous solution (pH = 7). Electrochemical impedance spectroscopy (EIS) of **1** and **2** were carried out in 0.2 M Na<sub>2</sub>SO<sub>4</sub> aqueous solution (pH = 7) with a bias of 2.0 V in the frequency range of 1–10 kHz. The photo-responsive signals of **1** and **2** were measured in 0.2 M Na<sub>2</sub>SO<sub>4</sub> aqueous solution (pH = 7) under chopped light at 1.0 V.

**Table S1** Selected bond lengths (Å) and angles (deg) for **1** and **2**.<sup>a</sup>

| <b>1</b>                                     |          | <b>2</b>                                     |          |
|----------------------------------------------|----------|----------------------------------------------|----------|
| Cu(1)–N(1)                                   | 2.018(5) | Cu(1)–N(1)                                   | 2.042(6) |
| Cu(1)–N(5) <sup>#2</sup>                     | 1.985(5) | Cu(1)–N(5) <sup>#2</sup>                     | 1.996(6) |
| Cu(1)–N(6) <sup>#1</sup>                     | 1.979(5) | Cu(1)–N(6) <sup>#1</sup>                     | 1.973(6) |
| N(6) <sup>#1</sup> –Cu(1)–N(1)               | 116.7(2) | N(6) <sup>#1</sup> –Cu(1)–N(1)               | 115.4(3) |
| N(6) <sup>#1</sup> –Cu(1)–N(5) <sup>#2</sup> | 126.1(2) | N(6) <sup>#1</sup> –Cu(1)–N(5) <sup>#2</sup> | 127.5(3) |
| N(5) <sup>#2</sup> –Cu(1)–N(1)               | 117.2(2) | N(5) <sup>#2</sup> –Cu(1)–N(1)               | 117.0(3) |

<sup>a</sup> Symmetry codes for **1**: <sup>#1</sup> 1 – x, 1 – y, z + 1/2, <sup>#2</sup> 1/2 + x, –1/2 – y, z. For **2**: <sup>#1</sup> 1 – x, 1 – y, z – 1/2, <sup>#2</sup> 1/2 + x, –1/2 – y, z.

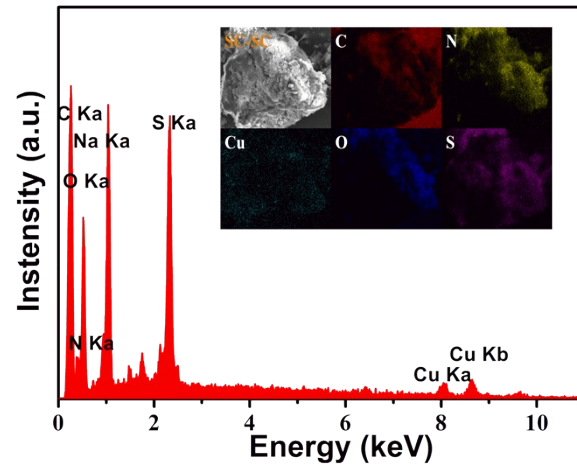

**Fig. S1** EDX spectra and elemental mappings for **2** after being soaked into the saturated  $\text{Na}_2\text{SO}_4$  solution.

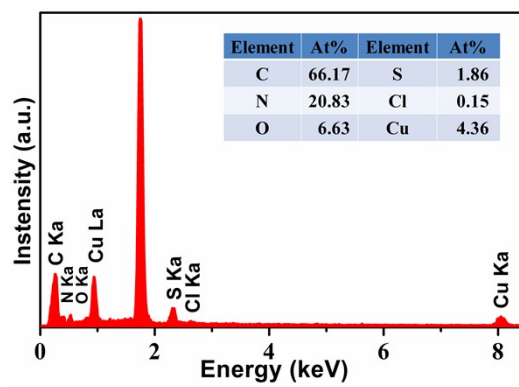

**Fig. S2** EDX spectra and atomic ratio for **1** after being soaked into the saturated  $\text{Cu}(\text{ClO}_4)_2$  solution.

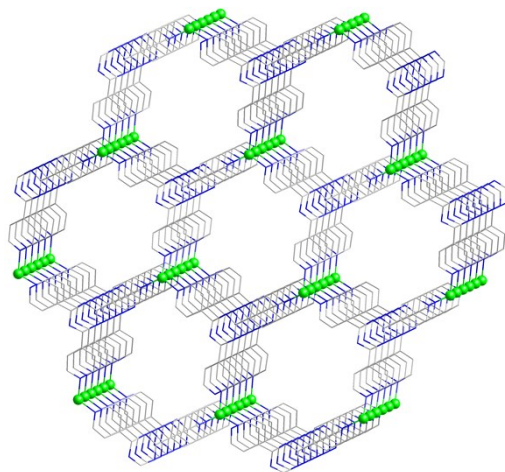

**Fig. S3** Single (10,3)-*b* topology with 1.

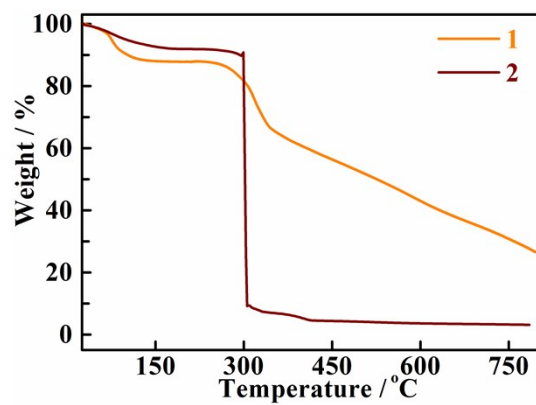

**Fig. S4** TG curve for 1 and 2.

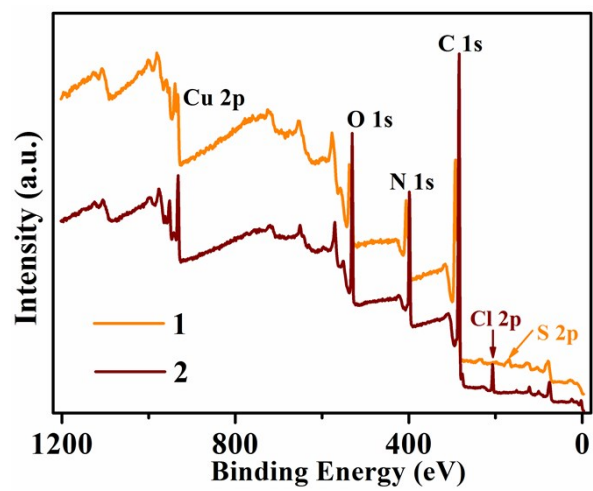

Fig. S5 Overall XPS spectra for 1 and 2.



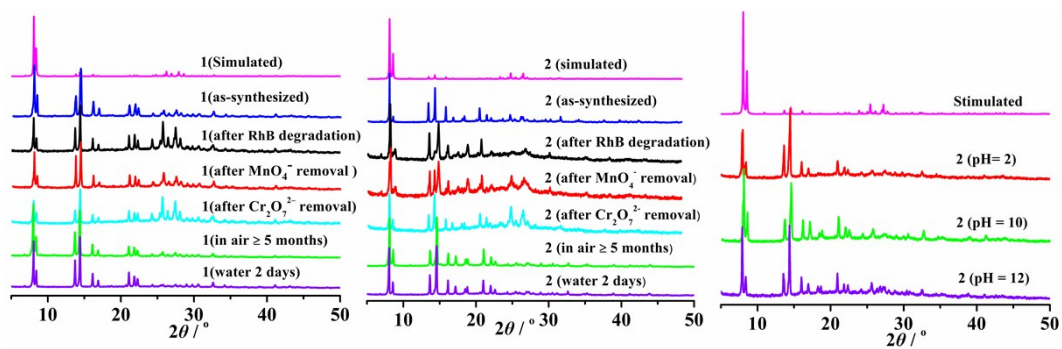

**Fig. S6** Simulated and experimental PXRD patterns for **1** and **2**.

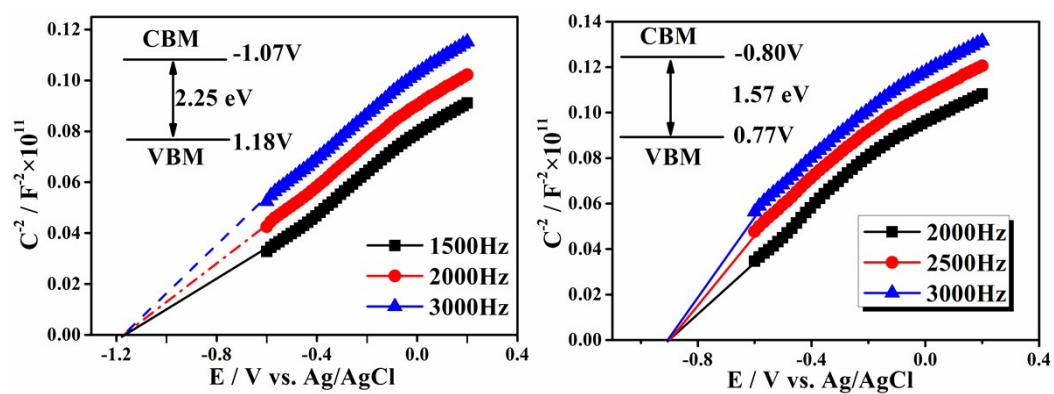

**Fig. S7** Mott-Schottky curves of **1** and **2** measured in  $Na_2SO_4$  aqueous solution.

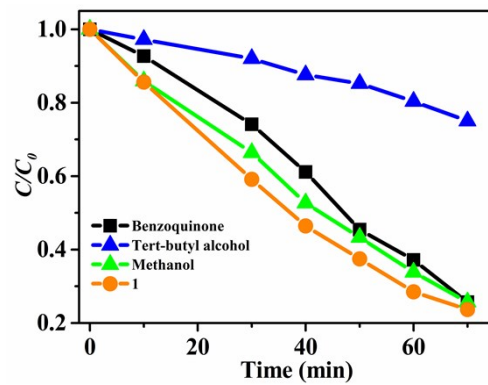

Fig. S8 Photodegradation efficiency over 1 in the presence of different free radical scavengers.

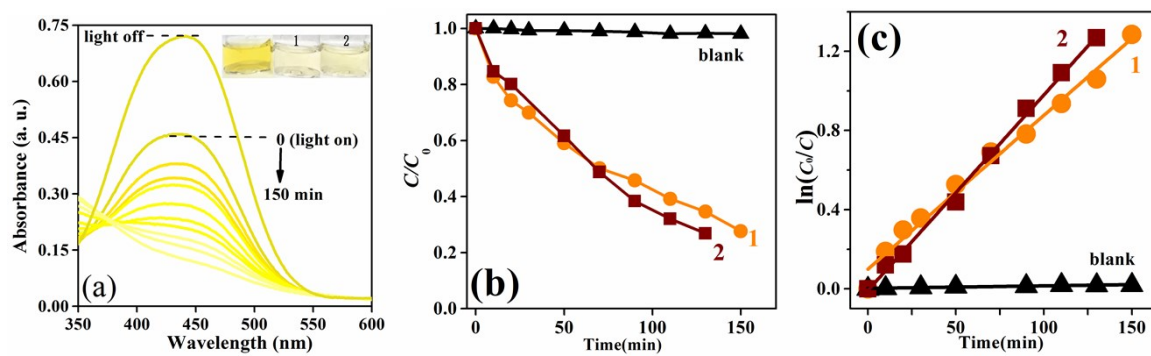

**Fig. S9** (a) Time-dependent adsorption spectra of MY in the presence of **1** and  $\text{H}_2\text{O}_2$  (Inset: photographs of aqueous My solutions before and after photodegradation). (b)  $C/C_0$  of MY as a function of the irradiation time in the presence of  $\text{H}_2\text{O}_2$ , **1** and  $\text{H}_2\text{O}_2$ , as well as **2** and  $\text{H}_2\text{O}_2$ . (c) Plots of  $\ln(C_0/C)$  vs. irradiation time for the photodegradation of MY over the photocatalysts.

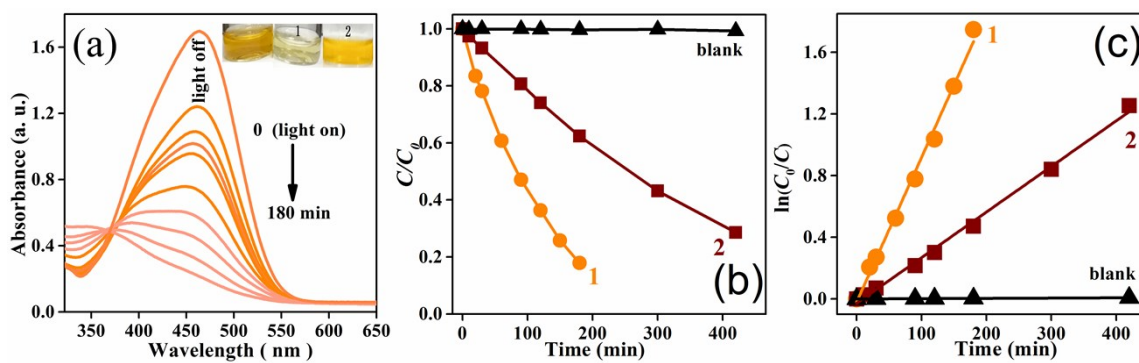

**Fig. S10** (a) Time-dependent adsorption spectra of MO in the presence of **1** and H<sub>2</sub>O<sub>2</sub> (Inset: photographs of aqueous MO solutions before and after photodegradation). (b)  $C/C_0$  of MO as a function of the irradiation time in the presence of H<sub>2</sub>O<sub>2</sub>, **1** and H<sub>2</sub>O<sub>2</sub>, as well as **2** and H<sub>2</sub>O<sub>2</sub>. (c) Plots of  $\ln(C_0/C)$  vs. irradiation time or the photodegradation of MO over the photocatalysts.

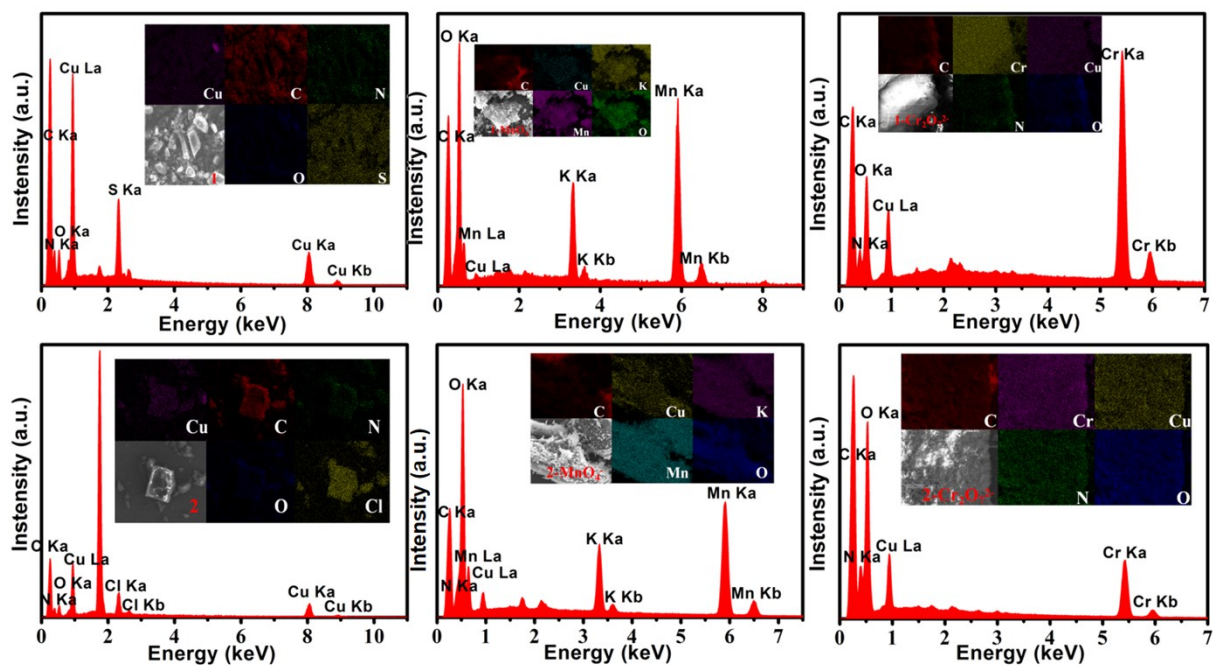

**Fig. S11** EDX spectra and elemental mappings for **1** and **2** before and after adsorption of  $\text{MnO}_4^-$  and  $\text{Cr}_2\text{O}_7^{2-}$  anions.

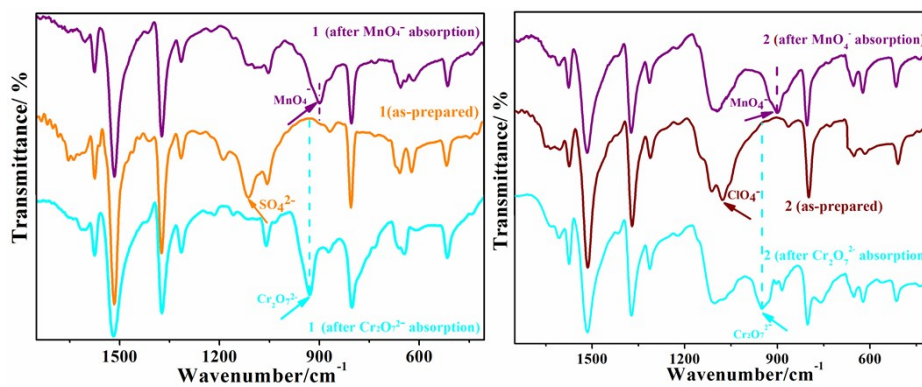

**Fig. S12** FT-IR spectra of **1** and **2** before and after adsorption of  $\text{MnO}_4^-$  and  $\text{Cr}_2\text{O}_7^{2-}$  anions.
